# Supplementary material for: Thalamocortical Circuit Controls Neuropathic Pain via Up-regulation of HCN2 in the Ventral Posterolateral Thalamus
Source: PubMed Central journal article supplement (PMC10169982; doi:10.1007/s12264-022-00989-5), 2022-12-20
Supplement: 12264_2022_989_MOESM1_ESM.pdf [file 12264_2022_989_MOESM1_ESM.pdf]

## Supplementary Information

### Supplementary Figures

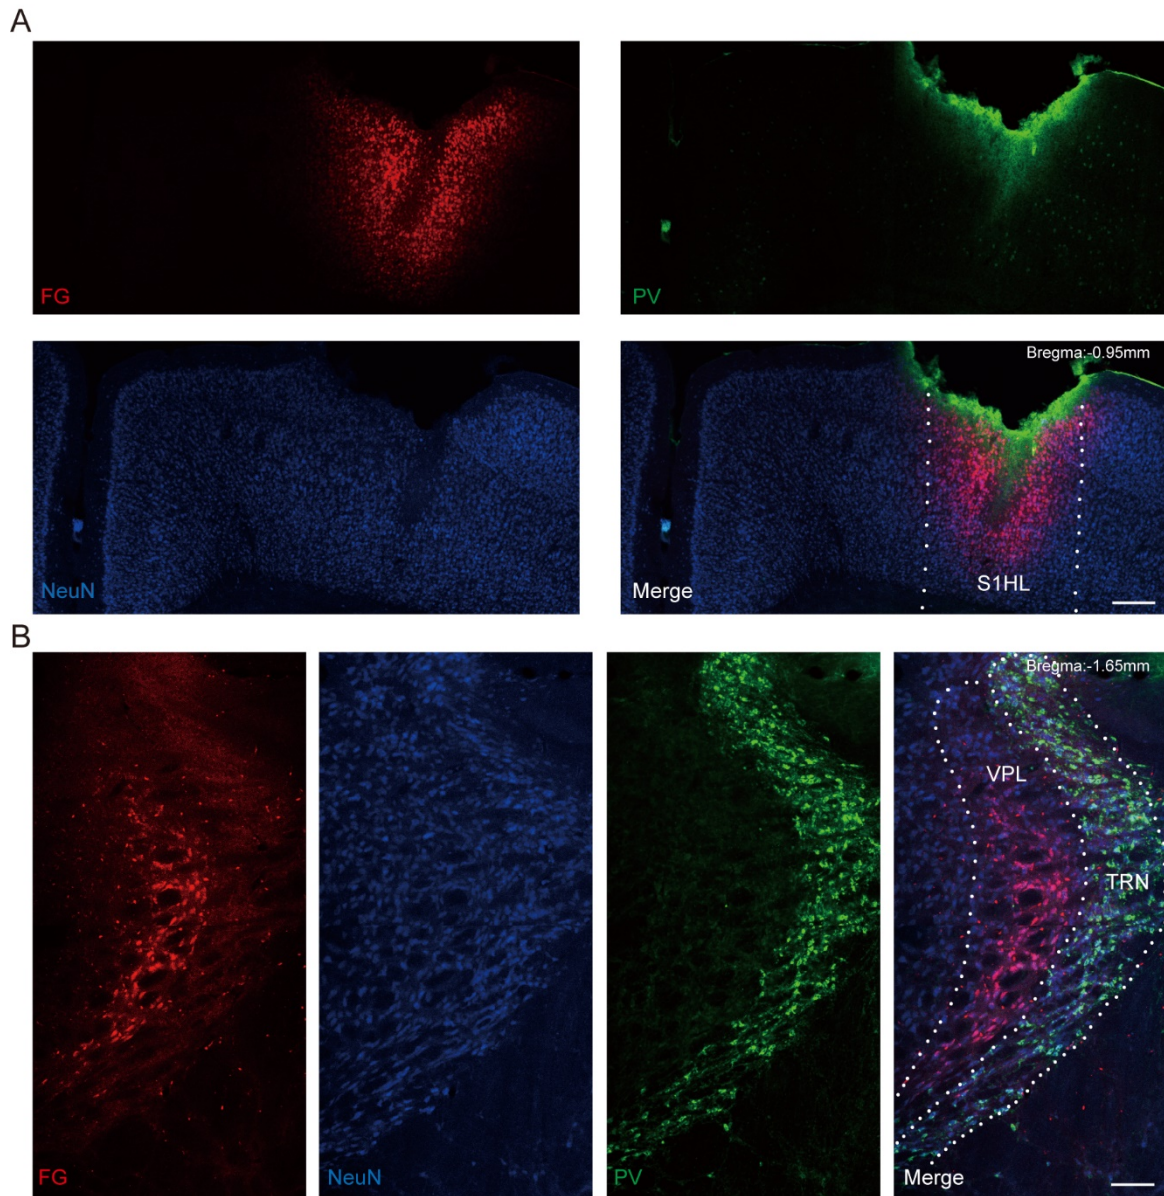

**Fig. S1** Retrograde tracer FG identifies the VPL–S1HL circuit. **A** Representative images of retrograde tracer FG injection in the S1HL. Scale bar, 200  $\mu$ m. **B** Representative images of retrograde tracer FG-labeled cell bodies in the VPL. Scale bar, 100  $\mu$ m. VPL, ventral posterolateral thalamus; S1HL, hindlimb region of the primary somatosensory cortex; PV, parvalbumin; TRN, thalamic reticular nucleus; FG, Fluoro-Gold.

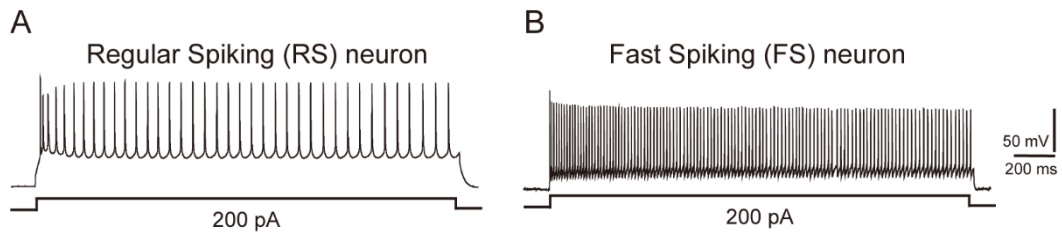

**Fig. S2** Representative traces of the firing patterns of S1HL neurons. **A** A regular spiking neuron. **B** A fast spiking neuron.

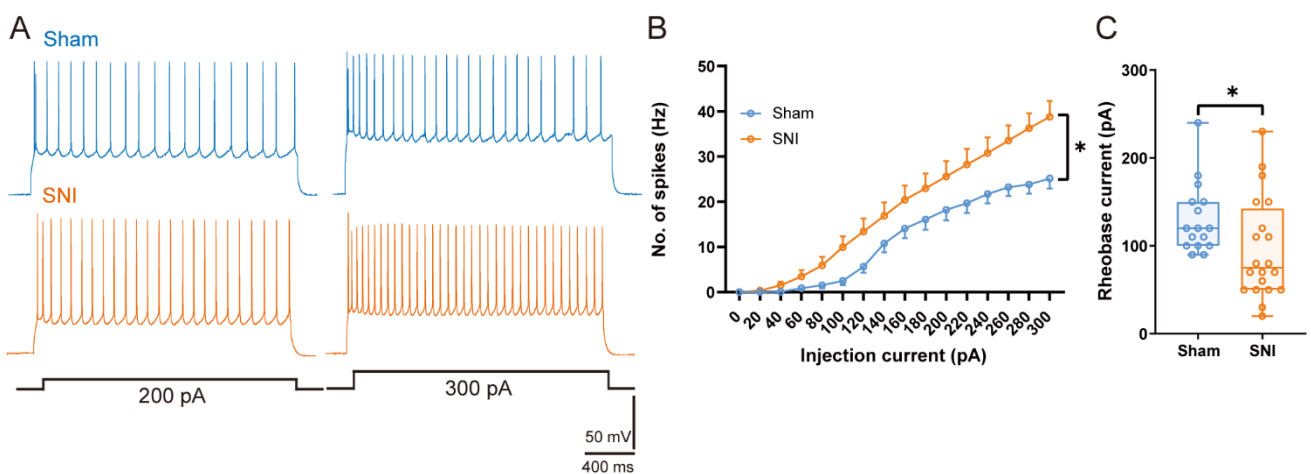

**Fig. S3** S1HL layer IV (L4) RS neuronal excitability is altered in neuropathic pain states. **A** Representative traces of spikes recorded from S1HL L4 RS neurons in sham and SNI mice. **B** Frequency-current ( $F-I$ ) curves showing the number of spikes of S1HL L4 RS neuronal responses to a series of 1-s current pulses from 0 pA to 300 pA in 20-pA steps in sham and SNI mice ( $n = 16$  cells from 7 sham mice,  $n = 17$  cells from 8 SNI mice, two-way ANOVA). **C** Statistical data showing the rheobase current of S1HL L4 RS neurons in sham and SNI mice ( $n = 16$  cells from 7 sham mice,  $n = 20$  cells from 8 SNI mice, Mann-Whitney  $U$  test).  $*P < 0.05$ . SNI, spared nerve injury; S1HL, hindlimb region of the primary somatosensory cortex; RS, regular spiking.

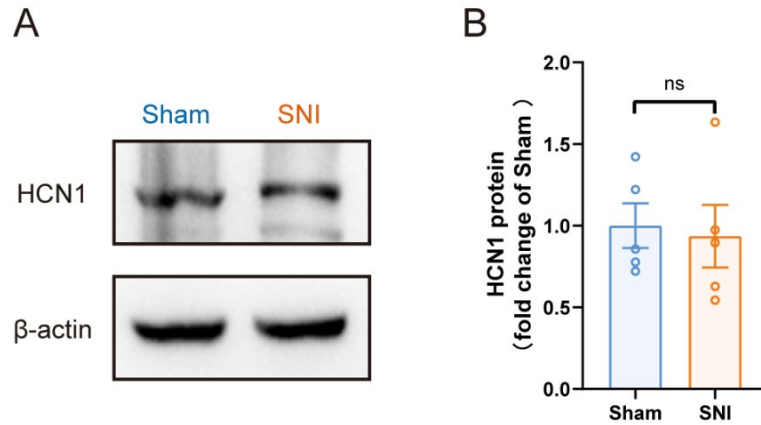

**Fig. S4** No changes in HCN1 of the VPL in neuropathic pain. **A** Representative blots and **B** quantitative analysis of Western blots of HCN1 from sham and SNI mice ( $n = 5$  per group,  $t$ -test; ns, no significant difference). VPL, ventral posterolateral thalamus; SNI, spared nerve injury; HCN1, hyperpolarization-activated cyclic nucleotide-gated channel 1.

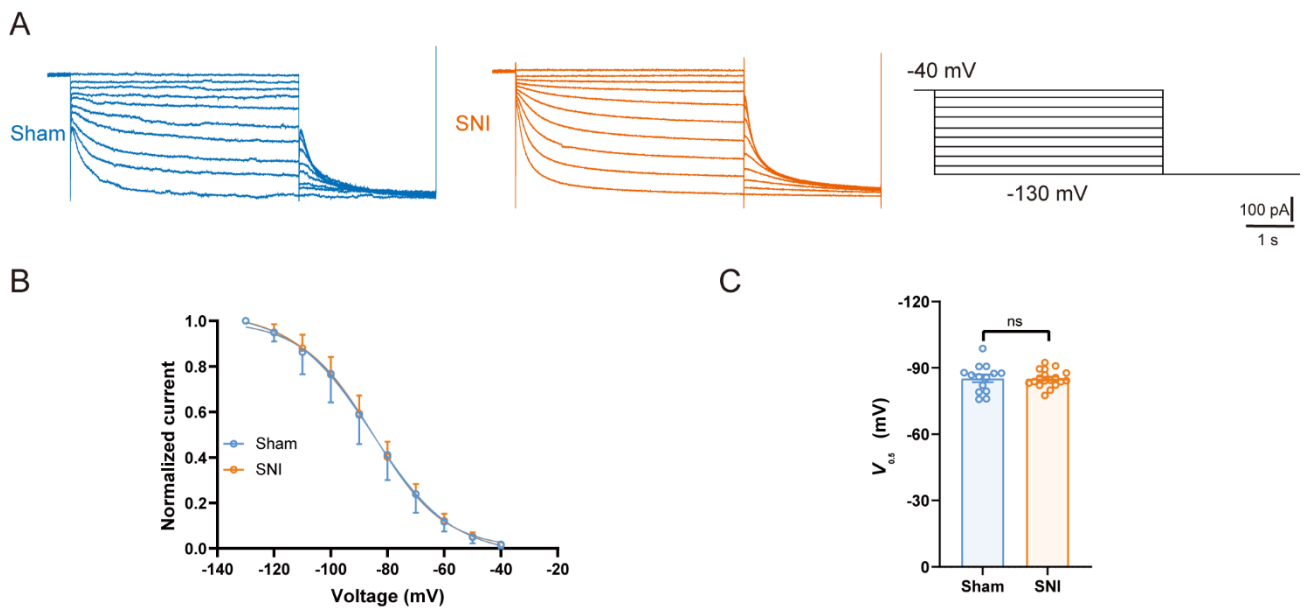

**Fig. S5** No changes in  $I_h$  activation of VPL TC neurons in neuropathic pain. **A** Representative traces of  $I_h$  activation in VPL TC neurons. **B** Normalization of the voltage-activation determined from tail currents in sham and SNI mice fitted with the Boltzmann equation ( $n = 14$  cells from 10 sham mice,  $n = 18$  cells from 11 SNI mice). **C**  $V_{0.5}$  of  $I_h$  activation from sham and SNI mice ( $n = 14$  cells from 10 sham mice,  $n = 18$  cells from 11

SNI mice, *t*-test). ns, no significant difference. VPL, ventral posterolateral thalamus; SNI, spared nerve injury; TC, thalamocortical.

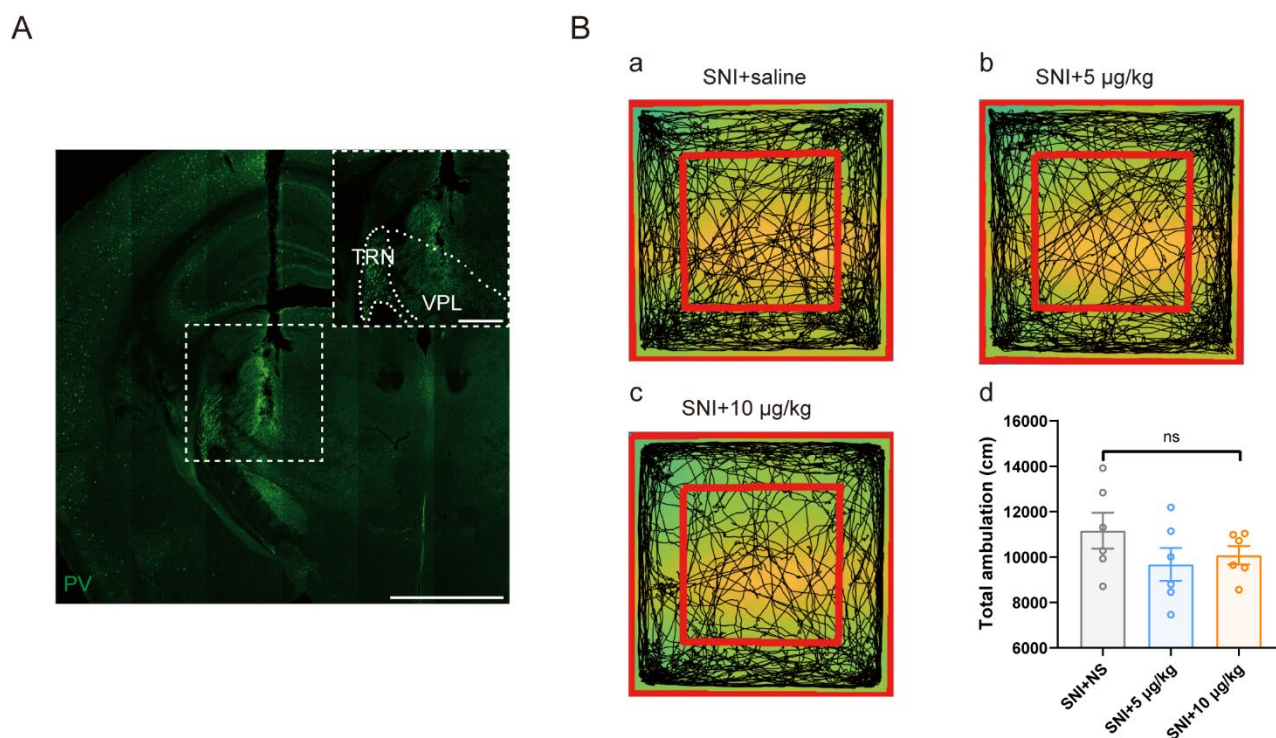

**Fig. S6** No changes in locomotor activity with ZD7288 injection. **A** Representative confocal image of cannula implantation in the VPL. Scale bars, 1 mm and 400 μm (inset). **B** Representative image of the OFT. **Ba** SNI + saline; **Bb** SNI + 5 μg/kg ZD7288; **Bc** SNI + 10 μg/kg ZD7288; **Bd** Statistical data showing the total ambulation of mice in the OFT ( $n = 6$  for each group, one-way ANOVA; ns, no significant difference). OFT, open field test; SNI, spared nerve injury.

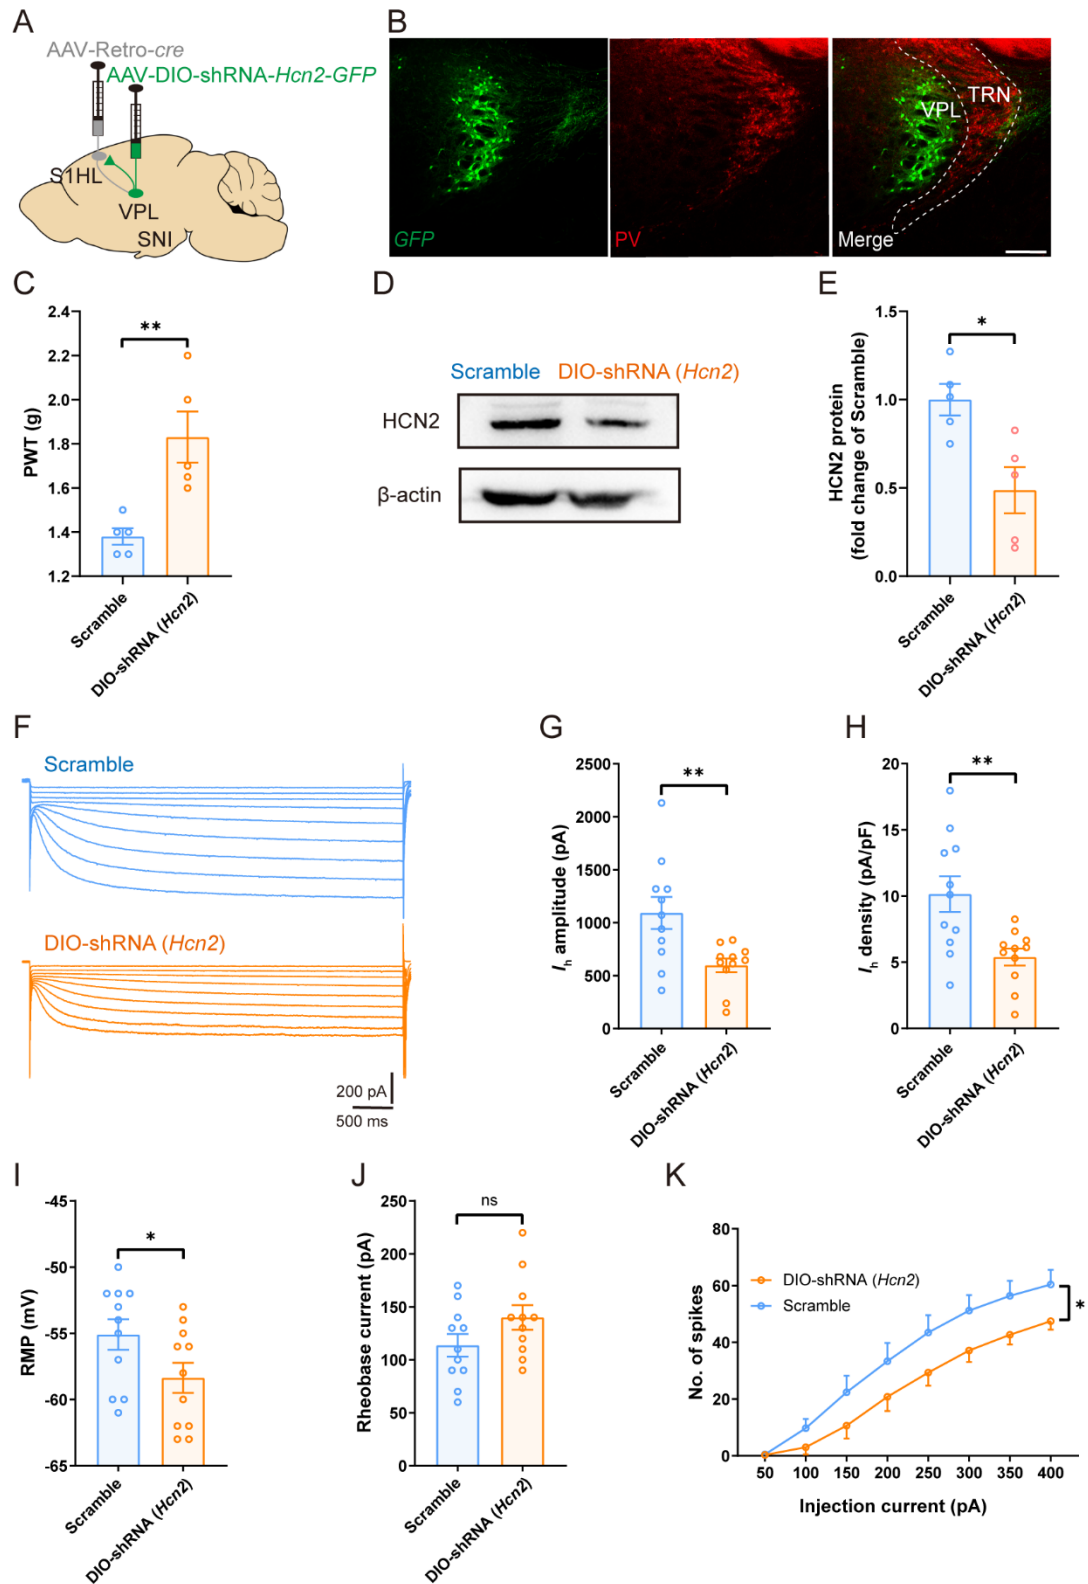

**Fig. S7** Virus knockdown of HCN2 in VPL<sup>S1HL</sup> TC neurons in SNI mice. **A** Schematic of AAV-Retro-cre in the S1HL and AAV-DIO-shRNA-Hcn2-GFP in the VPL. **B** Representative confocal images of AAV-DIO-shRNA-Hcn2-GFP in the VPL. Scale bar, 200  $\mu$ m. **C** PWT in the scrambled and DIO-shRNA

(*Hcn2*) mice [scrambled:  $1.38 \pm 0.04$  g vs DIO-shRNA (*Hcn2*):  $1.83 \pm 0.11$  g,  $t_{(8)} = 3.70$ ,  $P < 0.01$ ,  $n = 5$  per group, *t*-test]. **D, E** Representative blots (**D**) and quantitative analysis (**E**) of Western blots of HCN2 from scrambled and DIO-shRNA (*Hcn2*) mice [scrambled:  $1.00 \pm 0.08$  vs DIO-shRNA (*Hcn2*):  $0.49 \pm 0.13$ ,  $t_{(8)} = 3.25$ ,  $P < 0.05$ ,  $n = 5$  per group, *t*-test]. **F** Representative traces of  $I_h$  in VPL<sup>S1HL</sup> TC neurons. **G, H** Averaged  $I_h$  amplitude [scrambled:  $1091.00 \pm 151.50$  pA vs DIO-shRNA (*Hcn2*):  $596.00 \pm 64.94$  pA,  $t_{(20)} = 3.00$ ,  $P < 0.01$ , *t*-test] (**G**) and density [scrambled:  $10.14 \pm 1.35$  pA/pF vs DIO-shRNA (*Hcn2*):  $5.39 \pm 0.64$  pA/pF,  $t_{(20)} = 3.18$ ,  $P < 0.01$ , *t*-test] (**H**) at  $-130$  mV of VPL<sup>S1HL</sup> TC neurons in scrambled and DIO-shRNA (*Hcn2*) mice [ $n = 11$  cells from 4 scrambled mice,  $n = 11$  cells from 4 DIO-shRNA (*Hcn2*) mice, *t*-test]. **I** Summary of the RMP of VPL<sup>S1HL</sup> TC neurons in scrambled and DIO-shRNA (*Hcn2*) mice [scrambled:  $-55.09 \pm 1.16$  mV vs DIO-shRNA (*Hcn2*):  $-58.36 \pm 1.14$  mV,  $t_{(20)} = 2.11$ ,  $P < 0.05$ ,  $n = 11$  cells from 4 scrambled mice,  $n = 11$  cells from 4 DIO-shRNA (*Hcn2*) mice, *t*-test]. **J** Summary of the rheobase current of VPL<sup>S1HL</sup> TC neurons in scrambled and DIO-shRNA (*Hcn2*) mice [scrambled:  $113.60 \pm 10.73$  pA vs DIO-shRNA (*Hcn2*):  $140.00 \pm 11.60$  pA,  $t_{(20)} = 1.67$ ,  $P = 0.11$ ,  $n = 11$  cells from 4 scrambled mice,  $n = 11$  cells from 4 DIO-shRNA (*Hcn2*) mice, *t*-test]. **K** Frequency-current (*F-I*) curves showing the numbers of spikes in VPL<sup>S1HL</sup> TC neuronal responses to a series of 1-s current pulses from 50 pA to 400 pA in 50-pA steps [ $F_{(7,54)} = 2.55$ ,  $P < 0.05$ ,  $n = 11$  cells from 4 scrambled mice,  $n = 11$  cells from 4 DIO-shRNA (*Hcn2*) mice, two-way ANOVA]. \* $P < 0.05$ , \*\* $P < 0.01$ , ns, no significant difference. VPL, ventral posterolateral thalamus; PV, parvalbumin; TRN, thalamic reticular nucleus; HCN2, hyperpolarization-activated cyclic nucleotide-gated channel 2; S1HL, hindlimb region of the primary somatosensory cortex; PWT, paw withdrawal threshold; SNI, spared nerve injury; RMP, resting membrane potential.

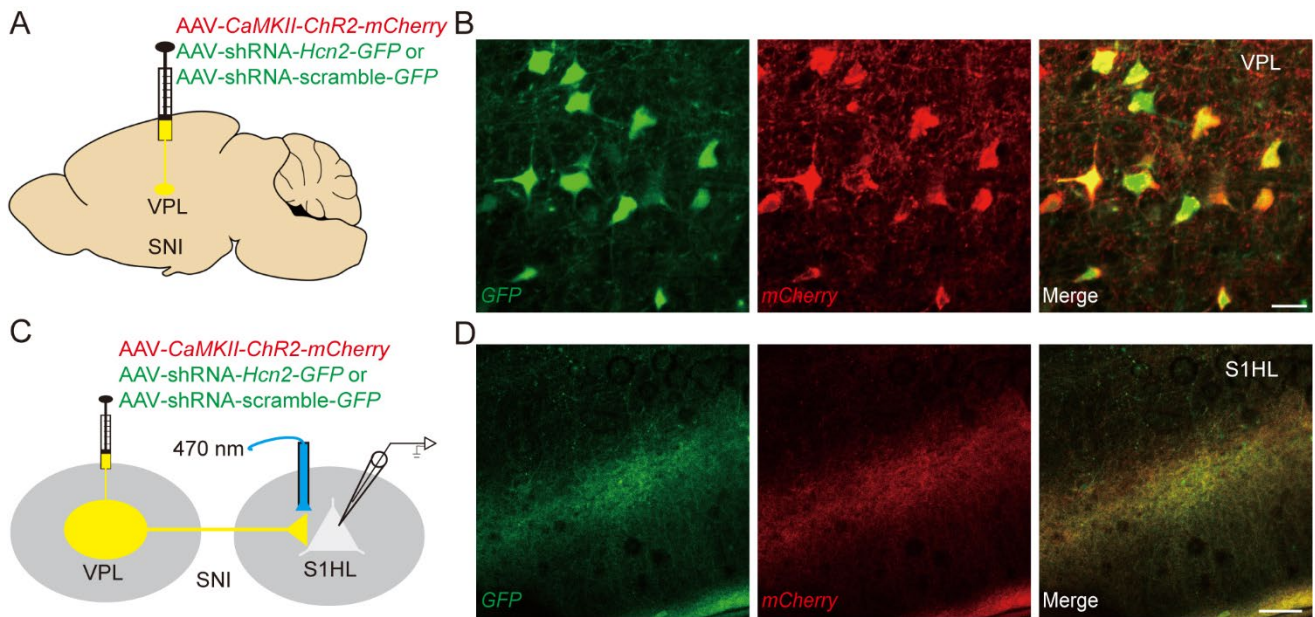

**Fig. S8** AAV-*CaMKII-ChR2-mCherry* and AAV-shRNA-*Hcn2*- or scrambled-*GFP* injection into the VPL. **A** Schematic of AAV-*CaMKII-ChR2-mCherry* and AAV-shRNA-*Hcn2*- or scrambled-*GFP* injection into the VPL. **B** Representative confocal images of AAV-*CaMKII-ChR2-mCherry* and AAV-shRNA-*Hcn2*- or scrambled-*GFP* injection into the VPL. Scale bar, 20  $\mu$ m. **C** Schematic of AAV-*CaMKII-ChR2-mCherry* and AAV-shRNA-*Hcn2*- or scrambled-*GFP* injection into the VPL and whole-cell recording in the S1HL. **D** Representative confocal images of AAV-*CaMKII-ChR2-mCherry* and AAV-shRNA-*Hcn2*- or scrambled-*GFP*-positive axon terminal expression in the S1HL. Scale bar, 100  $\mu$ m. VPL, ventral posterolateral thalamus; S1HL, hindlimb region of the primary somatosensory cortex; SNI, spared nerve injury.
